# Supplementary material for: ABHD6 loss-of-function in mesoaccumbens postsynaptic but not presynaptic neurons prevents diet-induced obesity in male mice
Source: PubMed Central journal article supplement — Nat Commun. 2024 Dec 16;15:10652. doi: 10.1038/s41467-024-54819-5 (PMC11649924; doi:10.1038/s41467-024-54819-5), 2024-12-16
Supplement: 41467_2024_54819_MOESM1_ESM.pdf [file 41467_2024_54819_MOESM1_ESM.pdf]

**Supplementary Table 1: Key resources table**

| <b>Antibodies and probes</b>                                                                        |
|-----------------------------------------------------------------------------------------------------|
| Anti-NeuN mouse antibody, clone A60, Millipore, MAB377                                              |
| Anti-GFP polyclonal rabbit antibody, Invitrogen, A6455                                              |
| Goat anti-mouse IgG (H+L) cross-adsorbed secondary antibody, Alexa Fluor 647, ThermoFisher, A-21235 |
| Goat anti-rabbit IgG (H+L) cross-adsorbed secondary antibody Alexa Fluor 488, ThermoFisher, A-11008 |
| Probe-Mm-Th-C2, ACD, 317621-C2                                                                      |
| Probe-Mm-Abhd6, ACD, 532861                                                                         |
| Probe-Mm-Slc32a1-C3, ACD, 319191-C3                                                                 |
| RNAscope Multiplex Fluorescent Detection Reagent, ACD, 320851                                       |
| <b>Experimental models: organisms/strains</b>                                                       |
| <i>Abhd6</i> <sup>lox/lox</sup> on C57Bl/6N background, Zhao et al., 2014, N/A                      |
| C57Bl/6NCrl, Charles River, 027                                                                     |
| C57BL/6J, Jackson Laboratoires, 000664                                                              |
| <b>Viruses</b>                                                                                      |
| AAV2/1.hSynapsin.HI.EGFP.WPRE.bGH, Penn Vector Core, AV-1-PV-1696/CS1221                            |
| AAV2/1.hSynapsin.HI.GFP.Cre.WPRE.SV40, Penn Vector Core, AV-1-P1848/CS1234                          |
| AAV9.TH.eGFP.WPRE.rBG, Penn Vector Core, V1802-1CS                                                  |
| AAV9.rTH.PI.Cre.SV40, Penn Vector Core, V5869R                                                      |
| <b>Commercial assays and reagents</b>                                                               |
| TRIzol, Invitrogen, 15596018                                                                        |
| Chloroform, Bioshop, CCL402.1                                                                       |
| Random Hexamer Phosphorylated; pd(N)6, GeneLink, 26-4000-10                                         |
| M-MLV Reverse Transcriptase, Invitrogen, 28025013                                                   |
| dNTP set (100mM), Invitrogen, 10297018                                                              |
| GlycoBlue Coprecipitant, Invitrogen, AM9516                                                         |
| RNAasin Plus RNase Inhibitor, ThermoFisher, PRN2611                                                 |
| Rotor Gene SYBR Green PCR Kit (2000), Qiagen, 204076                                                |
| SsoAdvanced Universal SYBR Green Supermix, Bio-Rad, 1725274                                         |
| Tris (1M) pH 8.0, RNase-free, ThermoFisher, AM9855G                                                 |
| MgCl <sub>2</sub> (1M), ThermoFisher, AM9530G                                                       |
| Goat serum, Sigma-Aldrich, G9023-10ml                                                               |
| Triton X-100, Sigma-Aldrich, T8787                                                                  |
| Vectashield Hardset Antifade Mounting Medium with DAPI, Vector Laboratories, H-1500                 |
| 2-methylbutane, ACP, M5342-500ML                                                                    |
| RNAscope Multiplex Reagent Kit (V1), ACD, 320850                                                    |
| RNAscope Multiplex Reagent Kit (V2), ACD, 323270                                                    |
| RNAscope Wash Buffer Reagents, ACD, 310091                                                          |
| Opal 570 reagent pack, AKOYA biosciences, FR1488001KT                                               |
| Opal 690 reagent pack, AKOYA biosciences, FP1497001KT                                               |
| ProLong Gold Antifade Mountant, ThermoFisher, P36934                                                |
| <b>Pharmacological agents</b>                                                                       |
| d-amphetamine, Sigma-Aldrich, A5880                                                                 |
| WWL70, Cayman Chemical, 10011213                                                                    |
| DMSO, Sigma-Aldrich, 41640-100ML                                                                    |
| WIN55,212-2, Cedarlane, BML-CR105-0010                                                              |
| AM251, Tocris Bioscience, 1117                                                                      |
| TTX, Tocris Biosciences, 1078                                                                       |
| NBQX, Tocris Biosciences, 0373                                                                      |
| PTX, Tocris Biosciences, 1128                                                                       |
| d-APV, Tocris Biosciences, 0106                                                                     |
| <b>Software and algorithms</b>                                                                      |
| Prism 9.3.1, GraphPad Software, <a href="https://www.graphpad.com">https://www.graphpad.com</a>     |
| Rotor-Gene Q Series Software 2.3.1, Qiagen, N/A                                                     |
| Med-PC 5.1, Med Associates, N/A                                                                     |
| Zen blue 3.4, Zeiss, N/A                                                                            |
| ImageJ, NIH, <a href="https://imagej.net/ij/index.html">https://imagej.net/ij/index.html</a>        |
| Clampfit 10.3, Molecular Devices, N/A                                                               |

|                                                                                                                          |
|--------------------------------------------------------------------------------------------------------------------------|
| Multiquant 2.0.2, SCIEX, N/A                                                                                             |
| NormFinder, Andersen et al., 2004, <a href="https://moma.dk/normfinder-software">https://moma.dk/normfinder-software</a> |
| EthoVision XT 15.0, Noldus, <a href="https://www.noldus.com/ethovision-xt">https://www.noldus.com/ethovision-xt</a>      |
| Oxymax for Windows V5.40, Columbus Instruments, N/A                                                                      |
| Wheel Manager Data Acquisition, Med Associates, N/A                                                                      |
| <b>Diet</b>                                                                                                              |
| Modified AIN-93G Purified Rodent Diet with 50% Fat Derived Calories from Palm Oil, Dyets Inc., 182101                    |
| Dustless precision pellets (20mg) sugar, Bio-Serv, F05550                                                                |

**Supplementary Table 2. List of Primer Sequences**

| <b>Gene</b>                     | <b>Forward sequence</b>   | <b>Reverse sequence</b>  |
|---------------------------------|---------------------------|--------------------------|
| <i>18s</i>                      | TAGCCAGGTTCTGGCCAACGG     | AAGGCCCCAAAAGTGGCGCA     |
| <i><math>\beta</math>-actin</i> | TTCTTGGGTATGGAATCCTGTGGCA | ACCAGACAGCACTGTGTTGGCATA |
| <i>Cyclophilin</i>              | GCTTTTCGCCGCTTGCTGCA      | TGCAAACAGCTCGAAGGAGACGC  |
| <i>Abhd6</i>                    | AGACCAGGTGCTTGATGT        | CTCTCCATCACTACCGAAT      |
| <i>Mgl1</i>                     | GTGCCTACCTGCTCATGGAAT     | GAGGACGGAGTTGGTCACTTC    |
| <i>Cnr1</i>                     | GTGCTGTTGCTGTTCAATTGTG    | CTTGCCATCTTCTGAGGTGTG    |
| <i>Dagla</i>                    | AGGAACACTTTTAGACGGCG      | AAGCTGAGAGCCACCAAGAG     |
| <i>Daglb</i>                    | AGGATTGGTGGCGACTGT        | TGGTCACTTCCACTGCAT       |
| <i>Faah</i>                     | GTATCGCCAGTCCGTCATTG      | GCCTATACCCTTTTTTCATGCC   |
| <i>Napepld</i>                  | TTCTTTGCTGGGGATACTGG      | GCAAGGTCAAAGGACCAAA      |

**Supplementary Table 3. Figure 1 statistics**

| Figure panel | Response variable                | n                                                               | Statistical analysis                                      | Result                                                                                                                                                                                                                                                                                                                                                                                                                                                                                                                                                                       |
|--------------|----------------------------------|-----------------------------------------------------------------|-----------------------------------------------------------|------------------------------------------------------------------------------------------------------------------------------------------------------------------------------------------------------------------------------------------------------------------------------------------------------------------------------------------------------------------------------------------------------------------------------------------------------------------------------------------------------------------------------------------------------------------------------|
| Figure 1d    | <i>Abhd6</i> relative expression | n=10 ABHD6 <sup>NAC</sup> .GFP, n=9<br>ABHD6 <sup>NAC</sup> KO  | Unpaired t-test                                           | t=5.219, df=17, P<0.0001                                                                                                                                                                                                                                                                                                                                                                                                                                                                                                                                                     |
| Figure 1d    | <i>Mgl1</i> relative expression  | n=11 ABHD6 <sup>NAC</sup> .GFP, n=9<br>ABHD6 <sup>NAC</sup> KO  | Unpaired t-test                                           | t=0.3965, df=18, P=0.6964                                                                                                                                                                                                                                                                                                                                                                                                                                                                                                                                                    |
| Figure 1d    | <i>Cnr1</i> relative expression  | n=10 ABHD6 <sup>NAC</sup> .GFP, n=8<br>ABHD6 <sup>NAC</sup> KO  | Unpaired t-test                                           | t=2.422, df=16, P=0.0277                                                                                                                                                                                                                                                                                                                                                                                                                                                                                                                                                     |
| Figure 1e    | 2-AG (ng/mg)                     | n=5 ABHD6 <sup>NAC</sup> .GFP, n=6<br>ABHD6 <sup>NAC</sup> KO   | Unpaired t-test                                           | t=3.187, df=9, P=0.0111                                                                                                                                                                                                                                                                                                                                                                                                                                                                                                                                                      |
| Figure 1e    | Anandamide (ng/mg)               | n=4 ABHD6 <sup>NAC</sup> .GFP, n=4<br>ABHD6 <sup>NAC</sup> KO   | Unpaired t-test                                           | t=0.3015, df=6, P=0.7732                                                                                                                                                                                                                                                                                                                                                                                                                                                                                                                                                     |
| Figure 1f    | Body weight (% change)           | n=8 ABHD6 <sup>NAC</sup> .GFP, n=7<br>ABHD6 <sup>NAC</sup> KO   | Two-way ANOVA, with Sidak's post-hoc multiple comparisons | Two-way ANOVA<br>Interaction: F <sub>(27,351)</sub> =6.642, P<0.0001<br>Time: F <sub>(27,351)</sub> =10.58, P<0.0001<br>Group: F <sub>(1,13)</sub> =5.332, P=0.0380<br><br>Sidak's multiple comparisons<br>All rows before day 44 adjusted P>0.05<br>Day 44 t=3.185, df=364, adjusted P=0.0431<br>Day 46 t=4.335, df=364, adjusted P=0.0005<br>Day 48 t=3.351, df=364, adjusted P=0.0246<br>Day 50 t=3.784, df=364, adjusted P=0.0050<br>Day 52 t=3.507, df=364, adjusted P=0.0142<br>Day 54 t=3.908, df=364, adjusted P=0.0031<br>Day 56 t=3.882, df=364, adjusted P=0.0034 |
| Figure 1g    | Lean mass (g)                    | n=10 ABHD6 <sup>NAC</sup> .GFP, n=12<br>ABHD6 <sup>NAC</sup> KO | Unpaired t-test                                           | t=2.765, df=20, P=0.0120                                                                                                                                                                                                                                                                                                                                                                                                                                                                                                                                                     |
| Figure 1g    | Fat mass (g)                     | n=10 ABHD6 <sup>NAC</sup> .GFP, n=12<br>ABHD6 <sup>NAC</sup> KO | Unpaired t-test                                           | t=3.355, df=20, P=0.0031                                                                                                                                                                                                                                                                                                                                                                                                                                                                                                                                                     |
| Figure 1h    | Food intake (kcal)               | n=6 ABHD6 <sup>NAC</sup> .GFP, n=9<br>ABHD6 <sup>NAC</sup> KO   | Two-way ANOVA                                             | Interaction: F <sub>(28,364)</sub> =0.4826, P=0.9889<br>Time: F <sub>(28,364)</sub> =1514, P<0.0001<br>Group: F <sub>(1,13)</sub> =0.6803, P=0.4244                                                                                                                                                                                                                                                                                                                                                                                                                          |
| Figure 1i    | Feed efficiency                  | n=6 ABHD6 <sup>NAC</sup> .GFP, n=9<br>ABHD6 <sup>NAC</sup> KO   | Unpaired t-test                                           | t=2.629, df=13, P=0.0208                                                                                                                                                                                                                                                                                                                                                                                                                                                                                                                                                     |
| Figure 1j    | Beam breaks                      | n=4 ABHD6 <sup>NAC</sup> .GFP, n=6<br>ABHD6 <sup>NAC</sup> KO   | Two-way ANOVA                                             | Interaction: F <sub>(42,336)</sub> =0.9034, P=0.6450<br>Time: F <sub>(42,336)</sub> =2.952, P<0.0001<br>Group: F <sub>(1,8)</sub> =4.261, P=0.0729                                                                                                                                                                                                                                                                                                                                                                                                                           |
| Figure 1k    | Beam breaks (dark cycle)         | n=4 ABHD6 <sup>NAC</sup> .GFP, n=6<br>ABHD6 <sup>NAC</sup> KO   | Unpaired t-test                                           | t=1.770, df=8, P=0.1148                                                                                                                                                                                                                                                                                                                                                                                                                                                                                                                                                      |
| Figure 1k    | Beam breaks (light cycle)        | n=4 ABHD6 <sup>NAC</sup> .GFP, n=6<br>ABHD6 <sup>NAC</sup> KO   | Unpaired t-test                                           | t=2.909, df=8, P=0.0196                                                                                                                                                                                                                                                                                                                                                                                                                                                                                                                                                      |
| Figure 1l    | Rotations                        | n=7 ABHD6 <sup>NAC</sup> .GFP, n=7<br>ABHD6 <sup>NAC</sup> KO   | Two-way ANOVA                                             | Interaction: F <sub>(25,300)</sub> =0.8558, P=0.6674<br>Time: F <sub>(25,300)</sub> =12.27, P<0.0001<br>Group: F <sub>(1,12)</sub> =0.7336, P=0.4085                                                                                                                                                                                                                                                                                                                                                                                                                         |
| Figure 1m    | Total rotations                  | n=7 ABHD6 <sup>NAC</sup> .GFP, n=7<br>ABHD6 <sup>NAC</sup> KO   | Unpaired t-test                                           | t=0.8565, df=12, P=0.4085                                                                                                                                                                                                                                                                                                                                                                                                                                                                                                                                                    |

**Supplementary Table 4. Supplementary Figure 1 statistics**

| Figure panel            | Response variable                          | n                                                           | Statistical analysis | Result                                                                                                                                             |
|-------------------------|--------------------------------------------|-------------------------------------------------------------|----------------------|----------------------------------------------------------------------------------------------------------------------------------------------------|
| Supplementary Figure 1a | <i>Dagla</i> relative expression           | n=6 ABHD6 <sup>NAc</sup> .GFP, n=6 ABHD6 <sup>NAc</sup> KO  | Unpaired t-test      | t=0.5603, df=10, P=0.5876                                                                                                                          |
| Supplementary Figure 1a | <i>Daglb</i> relative expression           | n=6 ABHD6 <sup>NAc</sup> .GFP, n=6 ABHD6 <sup>NAc</sup> KO  | Unpaired t-test      | t=0.1964, df=10, P=0.8483                                                                                                                          |
| Supplementary Figure 1a | <i>Faah</i> relative expression            | n=10 ABHD6 <sup>NAc</sup> .GFP, n=8 ABHD6 <sup>NAc</sup> KO | Unpaired t-test      | t=5.231, df=16, P<0.0001                                                                                                                           |
| Supplementary Figure 1a | <i>Napepld</i> relative expression         | n=6 ABHD6 <sup>NAc</sup> .GFP, n=6 ABHD6 <sup>NAc</sup> KO  | Unpaired t-test      | t=2.386, df=10, P=0.0383                                                                                                                           |
| Supplementary Figure 1b | Body length (mm)                           | n=7 ABHD6 <sup>NAc</sup> .GFP, n=7 ABHD6 <sup>NAc</sup> KO  | Unpaired t-test      | t=0.2329, df=12, P=0.8198                                                                                                                          |
| Supplementary Figure 1c | Energy expenditure (kcal/h)                | n=4 ABHD6 <sup>NAc</sup> .GFP, n=6 ABHD6 <sup>NAc</sup> KO  | Two-way ANOVA        | Interaction: F <sub>(42,336)</sub> =0.9100, P=0.6337<br>Time: F <sub>(42,336)</sub> =6.336, P<0.0001<br>Group: F <sub>(1,8)</sub> =1.407, P=0.2696 |
| Supplementary Figure 1d | Dark cycle energy expenditure (kcal/12hr)  | n=4 ABHD6 <sup>NAc</sup> .GFP, n=6 ABHD6 <sup>NAc</sup> KO  | Unpaired t-test      | t=1.170, df=8, P=0.2758                                                                                                                            |
| Supplementary Figure 1d | Light cycle energy expenditure (kcal/12hr) | n=4 ABHD6 <sup>NAc</sup> .GFP, n=6 ABHD6 <sup>NAc</sup> KO  | Unpaired t-test      | t=1.200, df=8, P=0.2644                                                                                                                            |
| Supplementary Figure 1e | RER                                        | n=4 ABHD6 <sup>NAc</sup> .GFP, n=6 ABHD6 <sup>NAc</sup> KO  | Two-way ANOVA        | Interaction: F <sub>(42,336)</sub> =1.447, P=0.0418<br>Time: F <sub>(42,336)</sub> =1.758, P=0.0037<br>Group: F <sub>(1,8)</sub> =4.115, P=0.0770  |
| Supplementary Figure 1f | Dark cycle RER                             | n=4 ABHD6 <sup>NAc</sup> .GFP, n=6 ABHD6 <sup>NAc</sup> KO  | Unpaired t-test      | t=1.985, df=8, P=0.0824                                                                                                                            |
| Supplementary Figure 1f | Light cycle RER                            | n=4 ABHD6 <sup>NAc</sup> .GFP, n=6 ABHD6 <sup>NAc</sup> KO  | Unpaired t-test      | t=0.8442, df=8, P=0.4231                                                                                                                           |
| Supplementary Figure 1g | Body weight (g)                            | n=7 ABHD6 <sup>NAc</sup> .GFP, n=7 ABHD6 <sup>NAc</sup> KO  | Two-way ANOVA        | Interaction F <sub>(3,36)</sub> =0.7558, p=0.5263<br>Time: F <sub>(3,36)</sub> =7.616, p=0.0005<br>Group: F <sub>(1,12)</sub> =0.5581, p=0.4694    |

**Supplementary Table 5. Figure 2 statistics**

| Figure panel | Response variable               | n                                                            | Statistical analysis | Result                    |
|--------------|---------------------------------|--------------------------------------------------------------|----------------------|---------------------------|
| Figure 2b    | Rewards achieved                | n=6 ABHD6 <sup>NAC</sup> .GFP, n=4 ABHD6 <sup>NAC</sup> KO   | Unpaired t-test      | t=3.445, df=8, P=0.0088   |
| Figure 2c    | Active lever discrimination (%) | n=6 ABHD6 <sup>NAC</sup> .GFP, n=4 ABHD6 <sup>NAC</sup> KO   | Unpaired t-test      | t=0.2461, df=8, P=0.8118  |
| Figure 2e    | Preference (%)                  | n=14 ABHD6 <sup>NAC</sup> .GFP, n=11 ABHD6 <sup>NAC</sup> KO | Unpaired t-test      | t=2.080, df=23, P=0.0488  |
| Figure 2f    | Center time (%)                 | n=8 ABHD6 <sup>NAC</sup> .GFP, n=8 ABHD6 <sup>NAC</sup> KO   | Unpaired t-test      | t=1.337, df=14, P=0.2026  |
| Figure 2g    | Center entries (%)              | n=8 ABHD6 <sup>NAC</sup> .GFP, n=8 ABHD6 <sup>NAC</sup> KO   | Unpaired t-test      | t=1.181, df=14, P=0.2571  |
| Figure 2h    | Velocity (cm/s)                 | n=8 ABHD6 <sup>NAC</sup> .GFP, n=8 ABHD6 <sup>NAC</sup> KO   | Unpaired t-test      | t=0.5624, df=14, P=0.5828 |
| Figure 2i    | Open arm time (%)               | n=8 ABHD6 <sup>NAC</sup> .GFP, n=9 ABHD6 <sup>NAC</sup> KO   | Unpaired t-test      | t=0.8866, df=15, P=0.3893 |
| Figure 2j    | Open arm entries (%)            | n=8 ABHD6 <sup>NAC</sup> .GFP, n=9 ABHD6 <sup>NAC</sup> KO   | Unpaired t-test      | t=0.4195, df=15, P=0.6808 |
| Figure 2k    | Velocity (cm/s)                 | n=8 ABHD6 <sup>NAC</sup> .GFP, n=9 ABHD6 <sup>NAC</sup> KO   | Unpaired t-test      | t=1.378, df=15, P=0.1883  |
| Figure 2l    | Time immobile (%)               | n=9 ABHD6 <sup>NAC</sup> .GFP, n=9 ABHD6 <sup>NAC</sup> KO   | Unpaired t-test      | t=0.9804, df=16, P=0.3415 |

**Supplementary Table 6. Supplementary Figure 2 statistics**

| Figure panel            | Response variable               | n                                                          | Statistical analysis | Result                    |
|-------------------------|---------------------------------|------------------------------------------------------------|----------------------|---------------------------|
| Supplementary Figure 2a | Rewards achieved                | n=6 ABHD6 <sup>NAC</sup> .GFP, n=4 ABHD6 <sup>NAC</sup> KO | Unpaired t-test      | t=0.2942, df=8, P=0.7761  |
| Supplementary Figure 2b | Active lever discrimination (%) | n=6 ABHD6 <sup>NAC</sup> .GFP, n=4 ABHD6 <sup>NAC</sup> KO | Unpaired t-test      | t=1.198, df=8, P=0.2653   |
| Supplementary Figure 2c | Velocity (cm/s)                 | n=9 ABHD6 <sup>NAC</sup> .GFP, n=9 ABHD6 <sup>NAC</sup> KO | Unpaired t-test      | t=0.2526, df=16, P=0.8038 |

**Supplementary Table 7. Figure 3 statistics**

| Figure panel | Response variable                          | n                                                              | Statistical analysis                                      | Result                                                                                                                                                                                                                                                                                                                                                                                                                                                                                                                                                                                                                                                                                                                                                                                                                                                                                                                                                                                                                                                                                                               |
|--------------|--------------------------------------------|----------------------------------------------------------------|-----------------------------------------------------------|----------------------------------------------------------------------------------------------------------------------------------------------------------------------------------------------------------------------------------------------------------------------------------------------------------------------------------------------------------------------------------------------------------------------------------------------------------------------------------------------------------------------------------------------------------------------------------------------------------------------------------------------------------------------------------------------------------------------------------------------------------------------------------------------------------------------------------------------------------------------------------------------------------------------------------------------------------------------------------------------------------------------------------------------------------------------------------------------------------------------|
| Figure 3a    | Body weight (% change)                     | n=9 ABHD6 <sup>NAC, GFP</sup> ,<br>n=6 ABHD6 <sup>NAC KO</sup> | Two-way ANOVA, with Sidak's post-hoc multiple comparisons | Two-way ANOVA<br>Interaction: $F_{(27,351)}=33.17$ , $P<0.0001$<br>Time: $F_{(27,351)}=44.89$ , $P<0.0001$<br>Group: $F_{(1,13)}=23.25$ , $P=0.0003$<br><br>Sidak's multiple comparisons<br>All rows before Day 26 adjusted $P>0.05$<br>Day 26 $t=3.507$ , $df=364$ , adjusted $P=0.0142$<br>Day 28 $t=4.293$ , $df=364$ , adjusted $P=0.0006$<br>Day 30 $t=4.681$ , $df=364$ , adjusted $P=0.0001$<br>Day 32 $t=5.063$ , $df=364$ , adjusted $P<0.0001$<br>Day 34 $t=5.730$ , $df=364$ , adjusted $P<0.0001$<br>Day 36 $t=5.594$ , $df=364$ , adjusted $P<0.0001$<br>Day 38 $t=6.271$ , $df=364$ , adjusted $P<0.0001$<br>Day 40 $t=6.446$ , $df=364$ , adjusted $P<0.0001$<br>Day 42 $t=6.923$ , $df=364$ , adjusted $P<0.0001$<br>Day 44 $t=7.000$ , $df=364$ , adjusted $P<0.0001$<br>Day 46 $t=7.574$ , $df=364$ , adjusted $P<0.0001$<br>Day 48 $t=7.558$ , $df=364$ , adjusted $P<0.0001$<br>Day 50 $t=7.642$ , $df=364$ , adjusted $P<0.0001$<br>Day 52 $t=7.535$ , $df=364$ , adjusted $P<0.0001$<br>Day 54 $t=7.845$ , $df=364$ , adjusted $P<0.0001$<br>Day 56 $t=8.425$ , $df=364$ , adjusted $P<0.0001$ |
| Figure 3b    | Lean mass (g)                              | n=13 ABHD6 <sup>NAC, GFP</sup> , n=13 ABHD6 <sup>NAC KO</sup>  | Unpaired t-test                                           | $t=2.450$ , $df=24$ , $P=0.0219$                                                                                                                                                                                                                                                                                                                                                                                                                                                                                                                                                                                                                                                                                                                                                                                                                                                                                                                                                                                                                                                                                     |
| Figure 3b    | Fat mass (g)                               | n=13 ABHD6 <sup>NAC, GFP</sup> , n=13 ABHD6 <sup>NAC KO</sup>  | Unpaired t-test                                           | $t=5.635$ , $df=24$ , $P<0.0001$                                                                                                                                                                                                                                                                                                                                                                                                                                                                                                                                                                                                                                                                                                                                                                                                                                                                                                                                                                                                                                                                                     |
| Figure 3c    | Cumulative food intake (kcal)              | n=9 ABHD6 <sup>NAC, GFP</sup> , n=6 ABHD6 <sup>NAC KO</sup>    | Two-way ANOVA, with Sidak's post-hoc multiple comparisons | Two-way ANOVA<br>Interaction: $F_{(28,364)}=3.544$ , $P<0.0001$<br>Time: $F_{(28,364)}=1698$ , $P<0.0001$<br>Group: $F_{(1,13)}=1.520$ , $P=0.2395$<br><br>Sidak's multiple comparisons<br>adjusted $P>0.05$ for all rows                                                                                                                                                                                                                                                                                                                                                                                                                                                                                                                                                                                                                                                                                                                                                                                                                                                                                            |
| Figure 3d    | Feed efficiency                            | n=9 ABHD6 <sup>NAC, GFP</sup> , n=6 ABHD6 <sup>NAC KO</sup>    | Unpaired t-test                                           | $t=5.995$ , $df=13$ , $P<0.0001$                                                                                                                                                                                                                                                                                                                                                                                                                                                                                                                                                                                                                                                                                                                                                                                                                                                                                                                                                                                                                                                                                     |
| Figure 3e    | Energy expenditure (kcal/h)                | n=7 ABHD6 <sup>NAC, GFP</sup> , n=6 ABHD6 <sup>NAC KO</sup>    | Two-way ANOVA                                             | Interaction: $F_{(42,462)}=1.685$ , $P=0.0059$<br>Time: $F_{(42,462)}=10.88$ , $P<0.0001$<br>Group: $F_{(1,11)}=0.06399$ , $P=0.8050$                                                                                                                                                                                                                                                                                                                                                                                                                                                                                                                                                                                                                                                                                                                                                                                                                                                                                                                                                                                |
| Figure 3f    | Dark cycle energy expenditure (kcal/12hr)  | n=7 ABHD6 <sup>NAC, GFP</sup> , n=6 ABHD6 <sup>NAC KO</sup>    | Unpaired t-test                                           | $t=0.3061$ , $df=11$ , $P=0.7652$                                                                                                                                                                                                                                                                                                                                                                                                                                                                                                                                                                                                                                                                                                                                                                                                                                                                                                                                                                                                                                                                                    |
| Figure 3f    | Light cycle energy expenditure (kcal/12hr) | n=7 ABHD6 <sup>NAC, GFP</sup> , n=6 ABHD6 <sup>NAC KO</sup>    | Unpaired t-test                                           | $t=0.1405$ , $df=11$ , $P=0.8908$                                                                                                                                                                                                                                                                                                                                                                                                                                                                                                                                                                                                                                                                                                                                                                                                                                                                                                                                                                                                                                                                                    |
| Figure 3g    | RER                                        | n=7 ABHD6 <sup>NAC, GFP</sup> , n=6 ABHD6 <sup>NAC KO</sup>    | Two-way ANOVA                                             | Interaction: $F_{(42,462)}=1.489$ , $P=0.0283$<br>Time: $F_{(42,462)}=1.351$ , $P=0.0752$<br>Group: $F_{(1,11)}=0.5066$ , $P=0.4914$                                                                                                                                                                                                                                                                                                                                                                                                                                                                                                                                                                                                                                                                                                                                                                                                                                                                                                                                                                                 |
| Figure 3h    | Dark cycle RER                             | n=7 ABHD6 <sup>NAC, GFP</sup> , n=6 ABHD6 <sup>NAC KO</sup>    | Unpaired t-test                                           | $t=1.062$ , $df=11$ , $P=0.3110$                                                                                                                                                                                                                                                                                                                                                                                                                                                                                                                                                                                                                                                                                                                                                                                                                                                                                                                                                                                                                                                                                     |
| Figure 3h    | Light cycle RER                            | n=7 ABHD6 <sup>NAC, GFP</sup> , n=6 ABHD6 <sup>NAC KO</sup>    | Unpaired t-test                                           | $t=0.2010$ , $df=11$ , $P=0.8444$                                                                                                                                                                                                                                                                                                                                                                                                                                                                                                                                                                                                                                                                                                                                                                                                                                                                                                                                                                                                                                                                                    |
| Figure 3i    | Beam breaks                                | n=7 ABHD6 <sup>NAC, GFP</sup> , n=6 ABHD6 <sup>NAC KO</sup>    | Two-way ANOVA                                             | Interaction: $F_{(42,462)}=1.874$ , $P=0.0011$<br>Time: $F_{(42,462)}=7.431$ , $P<0.0001$<br>Group: $F_{(1,11)}=6.114$ , $P=0.0310$                                                                                                                                                                                                                                                                                                                                                                                                                                                                                                                                                                                                                                                                                                                                                                                                                                                                                                                                                                                  |
| Figure 3j    | Dark cycle beam breaks                     | n=7 ABHD6 <sup>NAC, GFP</sup> , n=6 ABHD6 <sup>NAC KO</sup>    | Unpaired t-test                                           | $t=2.087$ , $df=11$ , $P=0.0610$                                                                                                                                                                                                                                                                                                                                                                                                                                                                                                                                                                                                                                                                                                                                                                                                                                                                                                                                                                                                                                                                                     |
| Figure 3j    | Light cycle beam breaks                    | n=7 ABHD6 <sup>NAC, GFP</sup> , n=6 ABHD6 <sup>NAC KO</sup>    | Unpaired t-test                                           | $t=2.318$ , $df=11$ , $P=0.0407$                                                                                                                                                                                                                                                                                                                                                                                                                                                                                                                                                                                                                                                                                                                                                                                                                                                                                                                                                                                                                                                                                     |
| Figure 3k    | Rotations                                  | n=6 ABHD6 <sup>NAC, GFP</sup> , n=7 ABHD6 <sup>NAC KO</sup>    | Two-way ANOVA                                             | Interaction: $F_{(25,275)}=2.434$ , $P=0.0002$<br>Time: $F_{(25,275)}=2.693$ , $p<0.0001$<br>Group: $F_{(1,11)}=5.873$ , $P=0.0338$                                                                                                                                                                                                                                                                                                                                                                                                                                                                                                                                                                                                                                                                                                                                                                                                                                                                                                                                                                                  |
| Figure 3l    | Total rotations                            | n=6 ABHD6 <sup>NAC, GFP</sup> , n=7 ABHD6 <sup>NAC KO</sup>    | Unpaired t-test                                           | $t=2.423$ , $df=11$ , $P=0.0338$                                                                                                                                                                                                                                                                                                                                                                                                                                                                                                                                                                                                                                                                                                                                                                                                                                                                                                                                                                                                                                                                                     |

**Supplementary Table 8. Supplementary Figure 3 statistics**

| Figure panel            | Response variable             | n                                                                                                                                | Statistical analysis                                      | Result                                                                                                                                                                                                                                                                                                                                                                                                                                                        |
|-------------------------|-------------------------------|----------------------------------------------------------------------------------------------------------------------------------|-----------------------------------------------------------|---------------------------------------------------------------------------------------------------------------------------------------------------------------------------------------------------------------------------------------------------------------------------------------------------------------------------------------------------------------------------------------------------------------------------------------------------------------|
| Supplementary Figure 3a | Cumulative food intake (kcal) | n=9 ABHD6 <sup>NAc</sup> <sub>GFP</sub> (HFD), n=6 ABHD6 <sup>NAc</sup> KO (HFD)                                                 | Unpaired t-test                                           | t=1.658, df=13, P=0.1213                                                                                                                                                                                                                                                                                                                                                                                                                                      |
| Supplementary Figure 3b | Rotations                     | n=7 ABHD6 <sup>NAc</sup> <sub>GFP</sub> (chow), n=6 ABHD6 <sup>NAc</sup> <sub>GFP</sub> (HFD), n=7 ABHD6 <sup>NAc</sup> KO (HFD) | Two-way ANOVA                                             | Interaction: F <sub>(50,425)</sub> =2.374, P<0.0001<br>Time: F <sub>(25,425)</sub> =5.514, P<0.0001<br>Group: F <sub>(2,17)</sub> =9.083, P=0.0021                                                                                                                                                                                                                                                                                                            |
| Supplementary Figure 3c | Rotations                     | n=7 ABHD6 <sup>NAc</sup> <sub>GFP</sub> (chow), n=6 ABHD6 <sup>NAc</sup> <sub>GFP</sub> (HFD), n=7 ABHD6 <sup>NAc</sup> KO (HFD) | One-way ANOVA, with Tukey's post-hoc multiple comparisons | One-way ANOVA<br>Group: F <sub>(2,17)</sub> =9.083, P=0.0021,<br><br>Tukey's multiple comparisons<br>ABHD6 <sup>NAc</sup> <sub>GFP</sub> vs. ABHD6 <sup>NAc</sup> <sub>GFP</sub> (HFD)<br>q=6.025, df=17, adjusted P=0.0015<br>ABHD6 <sup>NAc</sup> <sub>GFP</sub> vs. ABHD6 <sup>NAc</sup> KO (HFD)<br>q=2.723, df=17, adjusted P=0.1619<br>ABHD6 <sup>NAc</sup> <sub>GFP</sub> (HFD) vs. ABHD6 <sup>NAc</sup> KO (HFD)<br>q=3.408, df=17, adjusted P=0.0675 |

**Supplementary Table 9. Figure 4 statistics**

| Figure panel | Response variable            | n                                                                       | Statistical analysis | Result                                                                                                                                              |
|--------------|------------------------------|-------------------------------------------------------------------------|----------------------|-----------------------------------------------------------------------------------------------------------------------------------------------------|
| Figure 4b    | mIPSC frequency (Hz)         | n=21 ABHD6 <sup>NAc</sup> <sub>GFP</sub> , n=17 ABHD6 <sup>NAc</sup> KO | Unpaired t-test      | t=4.122, df=36, P=0.0002                                                                                                                            |
| Figure 4c    | mIPSC amplitude (pA)         | n=21 ABHD6 <sup>NAc</sup> <sub>GFP</sub> , n=17 ABHD6 <sup>NAc</sup> KO | Unpaired t-test      | t=2.971, df=36, P=0.0053                                                                                                                            |
| Figure 4d    | sIPSC frequency (Hz)         | n=12 ABHD6 <sup>NAc</sup> <sub>GFP</sub> , n=10 ABHD6 <sup>NAc</sup> KO | Unpaired t-test      | t=2.939, df=20, P=0.0081                                                                                                                            |
| Figure 4e    | sIPSC amplitude (pA)         | n=12 ABHD6 <sup>NAc</sup> <sub>GFP</sub> , n=10 ABHD6 <sup>NAc</sup> KO | Unpaired t-test      | t=3.707, df=20, P=0.0014                                                                                                                            |
| Figure 4f    | sEPSC frequency (Hz)         | n=8 ABHD6 <sup>NAc</sup> <sub>GFP</sub> , n=8 ABHD6 <sup>NAc</sup> KO   | Unpaired t-test      | t=0.03512, df=14, P=0.9725                                                                                                                          |
| Figure 4g    | sEPSC amplitude (pA)         | n=9 ABHD6 <sup>NAc</sup> <sub>GFP</sub> , n=8 ABHD6 <sup>NAc</sup> KO   | Unpaired t-test      | t=0.8296, df=15, P=0.4198                                                                                                                           |
| Figure 4h    | mIPSC frequency (% baseline) | n=10 ABHD6 <sup>NAc</sup> <sub>GFP</sub> , n=8 ABHD6 <sup>NAc</sup> KO  | Two-way ANOVA        | Interaction: F <sub>(21,336)</sub> =1.791, P=0.0185<br>Time: F <sub>(21,336)</sub> =13.90, P<0.0001<br>Group: F <sub>(1,16)</sub> =4.505, P=0.0497  |
| Figure 4i    | mIPSC amplitude (% baseline) | n=10 ABHD6 <sup>NAc</sup> <sub>GFP</sub> , n=8 ABHD6 <sup>NAc</sup> KO  | Two-way ANOVA        | Interaction: F <sub>(21,336)</sub> =1.226, P=0.2261<br>Time: F <sub>(21,336)</sub> =3.524, P<0.0001<br>Group: F <sub>(1,16)</sub> =0.2018, P=0.6593 |
| Figure 4j    | eIPSC amplitude (% baseline) | n=2 ABHD6 <sup>NAc</sup> <sub>GFP</sub> , n=3 ABHD6 <sup>NAc</sup> KO   | Two-way ANOVA        | Interaction: F <sub>(20,60)</sub> =0.4473, P=0.9757<br>Time: F <sub>(20,60)</sub> =21.75, P<0.0001<br>Group: F <sub>(1,3)</sub> =0.07500, P=0.8020  |
| Figure 4k    | mIPSC frequency (Hz)         | n=14 ABHD6 <sup>NAc</sup> <sub>GFP</sub> , n=14 ABHD6 <sup>NAc</sup> KO | Unpaired t-test      | t=2.111, df=26, P=0.0446                                                                                                                            |
| Figure 4l    | mIPSC amplitude (pA)         | n=14 ABHD6 <sup>NAc</sup> <sub>GFP</sub> , n=13 ABHD6 <sup>NAc</sup> KO | Unpaired t-test      | t=6.506, df=25, P<0.0001                                                                                                                            |



**Supplementary Table 10. Figure 5 statistics**

| Figure panel | Response variable                | n                                                                       | Statistical analysis | Result                                                                                                                                              |
|--------------|----------------------------------|-------------------------------------------------------------------------|----------------------|-----------------------------------------------------------------------------------------------------------------------------------------------------|
| Figure 5c    | <i>Abhd6</i> relative expression | n=38 ABHD6 <sup>VTA</sup> <sub>GFP</sub> , n=26 ABHD6 <sup>VTA</sup> KO | Unpaired t-test      | t=5.111, df=62, P<0.0001                                                                                                                            |
| Figure 5d    | Body weight (% change)           | n=10 ABHD6 <sup>VTA</sup> <sub>GFP</sub> , n=7 ABHD6 <sup>VTA</sup> KO  | Two-way ANOVA        | Interaction: F <sub>(6,90)</sub> =0.3644, P=0.8996<br>Time: F <sub>(6,90)</sub> =23.56, P<0.0001<br>Group: F <sub>(1,15)</sub> =0.6717, P=0.4253    |
| Figure 5e    | Cumulative food intake (g)       | n=10 ABHD6 <sup>VTA</sup> <sub>GFP</sub> , n=7 ABHD6 <sup>VTA</sup> KO  | Two-way ANOVA        | Interaction: F <sub>(6,90)</sub> =2.435, P=0.0315<br>Time: F <sub>(6,90)</sub> =5528, P<0.0001<br>Group: F <sub>(1,15)</sub> =7.669, P=0.0143       |
| Figure 5f    | Feed efficiency                  | n=10 ABHD6 <sup>VTA</sup> <sub>GFP</sub> , n=7 ABHD6 <sup>VTA</sup> KO  | Unpaired t-test      | t=0.7894, df=15, P=0.4422                                                                                                                           |
| Figure 5g    | RER                              | n=10 ABHD6 <sup>VTA</sup> <sub>GFP</sub> , n=7 ABHD6 <sup>VTA</sup> KO  | Two-way ANOVA        | Interaction: F <sub>(54,810)</sub> =0.7757, P=0.8794<br>Time: F <sub>(54,810)</sub> =15.21, P<0.0001<br>Group: F <sub>(1,15)</sub> =1.889, P=0.1884 |
| Figure 5h    | Dark cycle RER                   | n=10 ABHD6 <sup>VTA</sup> <sub>GFP</sub> , n=7 ABHD6 <sup>VTA</sup> KO  | Unpaired t-test      | t=1.865, df=15, P=0.0818                                                                                                                            |
| Figure 5h    | Light cycle RER                  | n=10 ABHD6 <sup>VTA</sup> <sub>GFP</sub> , n=7 ABHD6 <sup>VTA</sup> KO  | Unpaired t-test      | t=0.8289, df=15, P=0.4202                                                                                                                           |
| Figure 5i    | Beam breaks                      | n=10 ABHD6 <sup>VTA</sup> <sub>GFP</sub> , n=7 ABHD6 <sup>VTA</sup> KO  | Two-way ANOVA        | Interaction: F <sub>(55,825)</sub> =1.146, P=0.2223<br>Time: F <sub>(55,825)</sub> =8.964, P<0.0001<br>Group: F <sub>(1,15)</sub> =1.231, P=0.2847  |
| Figure 5j    | Dark cycle beam breaks           | n=10 ABHD6 <sup>VTA</sup> <sub>GFP</sub> , n=7 ABHD6 <sup>VTA</sup> KO  | Unpaired t-test      | t=0.9291, df=15, P=0.3675                                                                                                                           |
| Figure 5j    | Light cycle beam breaks          | n=10 ABHD6 <sup>VTA</sup> <sub>GFP</sub> , n=7 ABHD6 <sup>VTA</sup> KO  | Unpaired t-test      | t=1.178, df=15, P=0.2571                                                                                                                            |
| Figure 5k    | Body weight (% change)           | n=10 ABHD6 <sup>VTA</sup> <sub>GFP</sub> , n=7 ABHD6 <sup>VTA</sup> KO  | Two-way ANOVA        | Interaction: F <sub>(13,195)</sub> =1.483, P=0.1262<br>Time: F <sub>(13,195)</sub> =147.8, P<0.0001<br>Group: F <sub>(1,15)</sub> =0.6316, P=0.4392 |
| Figure 5l    | Lean mass (g)                    | n=10 ABHD6 <sup>VTA</sup> <sub>GFP</sub> , n=7 ABHD6 <sup>VTA</sup> KO  | Unpaired t-test      | t=0.3551, df=15, P=0.7274                                                                                                                           |
| Figure 5l    | Fat mass (g)                     | n=10 ABHD6 <sup>VTA</sup> <sub>GFP</sub> , n=7 ABHD6 <sup>VTA</sup> KO  | Unpaired t-test      | t=1.345, df=15, P=0.1987                                                                                                                            |
| Figure 5m    | Beam breaks                      | n=10 ABHD6 <sup>VTA</sup> <sub>GFP</sub> , n=7 ABHD6 <sup>VTA</sup> KO  | Two-way ANOVA        | Interaction: F <sub>(54,810)</sub> =0.7299, P=0.9270<br>Time: F <sub>(54,810)</sub> =7.742, P<0.0001<br>Group: F <sub>(1,15)</sub> =4.818, P=0.0443 |
| Figure 5n    | Dark cycle beam breaks           | n=10 ABHD6 <sup>VTA</sup> <sub>GFP</sub> , n=7 ABHD6 <sup>VTA</sup> KO  | Unpaired t-test      | t=1.767, df=15, P=0.0976                                                                                                                            |
| Figure 5n    | Light cycle beam breaks          | n=10 ABHD6 <sup>VTA</sup> <sub>GFP</sub> , n=7 ABHD6 <sup>VTA</sup> KO  | Unpaired t-test      | t=2.448, df=15, P=0.0271                                                                                                                            |

**Supplementary Table 11. Supplementary Figure 4 statistics**

| Figure panel            | Response variable                        | n                                                                         | Statistical analysis | Result                                                                                                                                |
|-------------------------|------------------------------------------|---------------------------------------------------------------------------|----------------------|---------------------------------------------------------------------------------------------------------------------------------------|
| Supplementary Figure 4a | Cumulative food intake (g)               | n=10 ABHD6 <sup>VTA</sup> <sub>GFP</sub> , n=7<br>ABHD6 <sup>VTA</sup> KO | Two-way ANOVA        | Interaction: $F_{(7,105)}=2.534$ , $P=0.0189$<br>Time: $F_{(7,105)}=460.0$ , $P<0.0001$<br>Group: $F_{(1,15)}=8.568$ , $P=0.0104$     |
| Supplementary Figure 4b | 24hr cumulative food intake (g)          | n=10 ABHD6 <sup>VTA</sup> <sub>GFP</sub> , n=7<br>ABHD6 <sup>VTA</sup> KO | Unpaired t-test      | $t=2.321$ , $df=15$ , $P=0.0348$                                                                                                      |
| Supplementary Figure 4c | Cumulative food intake (g)               | n=10 ABHD6 <sup>VTA</sup> <sub>GFP</sub> , n=7<br>ABHD6 <sup>VTA</sup> KO | Two-way ANOVA        | Interaction: $F_{(7,105)}=0.5852$ , $P=0.7667$<br>Time: $F_{(7,105)}=1076$ , $P<0.0001$<br>Group: $F_{(1,15)}=0.1479$ , $P=0.7059$    |
| Supplementary Figure 4d | Final cumulative food intake (g)         | n=10 ABHD6 <sup>VTA</sup> <sub>GFP</sub> , n=7<br>ABHD6 <sup>VTA</sup> KO | Unpaired t-test      | $t=1.961$ , $df=15$ , $P=0.0687$                                                                                                      |
| Supplementary Figure 4e | Energy expenditure (kcal/h)              | n=10 ABHD6 <sup>VTA</sup> <sub>GFP</sub> , n=7<br>ABHD6 <sup>VTA</sup> KO | Two-way ANOVA        | Interaction: $F_{(55,825)}=1.299$ , $P=0.0754$<br>Time: $F_{(55,825)}=16.29$ , $P<0.0001$<br>Group: $F_{(1,15)}=0.01675$ , $P=0.8987$ |
| Supplementary Figure 4f | Dark cycle energy expenditure (kcal/12h) | n=10 ABHD6 <sup>VTA</sup> <sub>GFP</sub> , n=7<br>ABHD6 <sup>VTA</sup> KO | Unpaired t-test      | $t=0.001040$ , $df=15$ , $P=0.9992$                                                                                                   |
| Supplementary Figure 4f | Light cycle energy expenditure           | n=10 ABHD6 <sup>VTA</sup> <sub>GFP</sub> , n=7<br>ABHD6 <sup>VTA</sup> KO | Unpaired t-test      | $t=0.1616$ , $df=15$ , $P=0.8738$                                                                                                     |
| Supplementary Figure 4g | Cumulative food intake (kcal)            | n=10 ABHD6 <sup>VTA</sup> <sub>GFP</sub> , n=7<br>ABHD6 <sup>VTA</sup> KO | Two-way ANOVA        | Interaction: $F_{(13,195)}=1.341$ , $P=0.1923$<br>Time: $F_{(13,195)}=4384$ , $P<0.0001$<br>Group: $F_{(1,15)}=0.2960$ , $P=0.5944$   |
| Supplementary Figure 4h | Feed efficiency                          | n=10 ABHD6 <sup>VTA</sup> <sub>GFP</sub> , n=7<br>ABHD6 <sup>VTA</sup> KO | Unpaired t-test      | $t=1.589$ , $df=15$ , $P=0.1329$                                                                                                      |
| Supplementary Figure 4i | Energy expenditure (kcal/h)              | n=10 ABHD6 <sup>VTA</sup> <sub>GFP</sub> , n=7<br>ABHD6 <sup>VTA</sup> KO | Two-way ANOVA        | Interaction: $F_{(54,810)}=0.6590$ , $P=0.9723$<br>Time: $F_{(54,810)}=16.31$ , $P<0.0001$<br>Group: $F_{(1,15)}=0.1206$ , $P=0.7332$ |
| Supplementary Figure 4j | Energy expenditure (kcal/h)              | n=10 ABHD6 <sup>VTA</sup> <sub>GFP</sub> , n=7<br>ABHD6 <sup>VTA</sup> KO | Unpaired t-test      | $t=0.7244$ , $df=15$ , $P=0.4800$                                                                                                     |
| Supplementary Figure 4j | Energy expenditure (kcal/h)              | n=10 ABHD6 <sup>VTA</sup> <sub>GFP</sub> , n=7<br>ABHD6 <sup>VTA</sup> KO | Unpaired t-test      | $t=0.1987$ , $df=15$ , $P=0.8452$                                                                                                     |
| Supplementary Figure 4k | RER                                      | n=10 ABHD6 <sup>VTA</sup> <sub>GFP</sub> , n=7<br>ABHD6 <sup>VTA</sup> KO | Two-way ANOVA        | Interaction: $F_{(54,810)}=1.069$ , $P=0.3453$<br>Time: $F_{(54,810)}=5.771$ , $P<0.0001$<br>Group: $F_{(1,15)}=0.6918$ , $P=0.4186$  |
| Supplementary Figure 4l | Dark cycle RER                           | n=10 ABHD6 <sup>VTA</sup> <sub>GFP</sub> , n=7<br>ABHD6 <sup>VTA</sup> KO | Unpaired t-test      | $t=0.8336$ , $df=15$ , $P=0.4176$                                                                                                     |
| Supplementary Figure 4l | Light cycle RER                          | n=10 ABHD6 <sup>VTA</sup> <sub>GFP</sub> , n=7<br>ABHD6 <sup>VTA</sup> KO | Unpaired t-test      | $t=1.313$ , $df=15$ , $P=0.2090$                                                                                                      |

**Supplementary Table 12. Figure 6 statistics**

| Figure panel | Response variable                        | n                                                                          | Statistical analysis | Result                     |
|--------------|------------------------------------------|----------------------------------------------------------------------------|----------------------|----------------------------|
| Figure 6a    | Center time (%)                          | n=12 ABHD6 <sup>VTA</sup> <sub>GFP</sub> , n=10<br>ABHD6 <sup>VTA</sup> KO | Unpaired t-test      | t=0.6640, df=20, P=0.5143  |
| Figure 6b    | Center entries (%)                       | n=12 ABHD6 <sup>VTA</sup> <sub>GFP</sub> , n=10<br>ABHD6 <sup>VTA</sup> KO | Unpaired t-test      | t=0.3393, df=20, P=0.7379  |
| Figure 6c    | Open arm time (%)                        | n=12 ABHD6 <sup>VTA</sup> <sub>GFP</sub> , n=10<br>ABHD6 <sup>VTA</sup> KO | Unpaired t-test      | t=1.073, df=20, P=0.2961   |
| Figure 6d    | Open arm entries (%)                     | n=12 ABHD6 <sup>VTA</sup> <sub>GFP</sub> , n=10<br>ABHD6 <sup>VTA</sup> KO | Unpaired t-test      | t=0.06123, df=20, P=0.9518 |
| Figure 6e    | Interaction time difference (s)          | n=12 ABHD6 <sup>VTA</sup> <sub>GFP</sub> , n=10<br>ABHD6 <sup>VTA</sup> KO | Unpaired t-test      | t=0.6239, df=20, P=0.5397  |
| Figure 6h    | Change in rewards achieved (%)           | n=9 ABHD6 <sup>VTA</sup> <sub>GFP</sub> , n=6<br>ABHD6 <sup>VTA</sup> KO   | Unpaired t-test      | t=0.6367, df=13, P=0.5354  |
| Figure 6i    | Change in active lever responses (%)     | n=9 ABHD6 <sup>VTA</sup> <sub>GFP</sub> , n=6<br>ABHD6 <sup>VTA</sup> KO   | Unpaired t-test      | t=0.5550, df=13, P=0.5883  |
| Figure 6j    | Pre-fast active lever discrimination (%) | n=9 ABHD6 <sup>VTA</sup> <sub>GFP</sub> , n=6<br>ABHD6 <sup>VTA</sup> KO   | Unpaired t-test      | t=0.3545, df=13, P=0.7286  |
| Figure 6j    | Fast active lever discrimination (%)     | n=9 ABHD6 <sup>VTA</sup> <sub>GFP</sub> , n=6<br>ABHD6 <sup>VTA</sup> KO   | Unpaired t-test      | t=0.4081, df=13, P=0.6898  |
| Figure 6m    | Change in rewards achieved (%)           | n=7 ABHD6 <sup>TH</sup> <sub>GFP</sub> , n=7<br>ABHD6 <sup>TH</sup> KO     | Unpaired t-test      | t=2.186, df=12, P=0.0494   |
| Figure 6n    | Change in active lever responses (%)     | n=7 ABHD6 <sup>TH</sup> <sub>GFP</sub> , n=7<br>ABHD6 <sup>TH</sup> KO     | Unpaired t-test      | t=2.442, df=12, P=0.0310   |
| Figure 6o    | Pre-fast active lever discrimination (%) | n=7 ABHD6 <sup>TH</sup> <sub>GFP</sub> , n=7<br>ABHD6 <sup>TH</sup> KO     | Unpaired t-test      | t=1.124, df=12, P=0.2831   |
| Figure 6o    | Fast active lever discrimination (%)     | n=7 ABHD6 <sup>TH</sup> <sub>GFP</sub> , n=7<br>ABHD6 <sup>TH</sup> KO     | Unpaired t-test      | t=0.3541, df=12, P=0.7294  |

**Supplementary Table 13. Supplementary Figure 5 statistics**

| Figure panel            | Response variable                           | n                                                                 | Statistical analysis | Result                     |
|-------------------------|---------------------------------------------|-------------------------------------------------------------------|----------------------|----------------------------|
| Supplementary Figure 5a | Velocity (cm/s)                             | n=12 ABHD6 <sup>VTA</sup><br>GFP, n=10<br>ABHD6 <sup>VTA</sup> KO | Unpaired t-test      | t=0.6297, df=20, P=0.5360  |
| Supplementary Figure 5b | Velocity (cm/s)                             | n=12 ABHD6 <sup>VTA</sup><br>GFP, n=10<br>ABHD6 <sup>VTA</sup> KO | Unpaired t-test      | t=0.3054, df=20, P=0.7632  |
| Supplementary Figure 5c | Demo preference (%)                         | n=12 ABHD6 <sup>VTA</sup><br>GFP, n=10<br>ABHD6 <sup>VTA</sup> KO | Unpaired t-test      | t=0.2838, df=20, P=0.7795  |
| Supplementary Figure 5d | Velocity (cm/s)                             | n=12 ABHD6 <sup>VTA</sup><br>GFP, n=10<br>ABHD6 <sup>VTA</sup> KO | Unpaired t-test      | t=0.2546, df=20, P=0.8016  |
| Supplementary Figure 5e | Pre-surgery mean rewards achieved           | n=9 ABHD6 <sup>VTA</sup><br>GFP, n=6<br>ABHD6 <sup>VTA</sup> KO   | Unpaired t-test      | t=0.6793, df=13, P=0.5089  |
| Supplementary Figure 5f | Active lever discrimination (%)             | n=9 ABHD6 <sup>VTA</sup><br>GFP, n=6<br>ABHD6 <sup>VTA</sup> KO   | Unpaired t-test      | t=0.9896, df=13, P=0.3404  |
| Supplementary Figure 5g | Pre-surgery mean rewards achieved           | n=7 ABHD6 <sup>TH</sup><br>GFP, n=7<br>ABHD6 <sup>TH</sup> KO     | Unpaired t-test      | t=0.6933, df=12, P=0.5013  |
| Supplementary Figure 5h | Pre-surgery active lever discrimination (%) | n=7 ABHD6 <sup>TH</sup><br>GFP, n=7<br>ABHD6 <sup>TH</sup> KO     | Unpaired t-test      | t=0.08657, df=12, P=0.9324 |

**Supplementary Table 14. Figure 7 statistics**

| Figure panel | Response variable                          | n                       | Statistical analysis                                      | Result                                                                                                                                                                                                                                                                                                                                                                                                                                                                                                                                                                                                      |
|--------------|--------------------------------------------|-------------------------|-----------------------------------------------------------|-------------------------------------------------------------------------------------------------------------------------------------------------------------------------------------------------------------------------------------------------------------------------------------------------------------------------------------------------------------------------------------------------------------------------------------------------------------------------------------------------------------------------------------------------------------------------------------------------------------|
| Figure 7a    | Body weight (% change)                     | n=9 vehicle, n=10 WWL70 | Two-way ANOVA, with Sidak's post hoc multiple comparisons | Two-way ANOVA<br>Interaction: $F_{(11,187)}=4.300$ , $P<0.0001$<br>Time: $F_{(11,187)}=121.2$ , $P<0.0001$<br>Group: $F_{(1,17)}=13.44$ , $P=0.0019$<br><br>Sidak's post hoc<br>All rows before Day 12 adjusted $P>0.05$<br>Day 12 $t=3.270$ , $df=204$ , adjusted $P=0.0150$<br>Day 14 $t=3.419$ , $df=204$ , adjusted $P=0.0091$<br>Day 18 $t=3.407$ , $df=204$ , adjusted $P=0.0095$<br>Day 21 $t=3.814$ , $df=204$ , adjusted $P=0.0022$<br>Day 24 $t=4.074$ , $df=204$ , adjusted $P=0.0008$<br>Day 26 $t=4.196$ , $df=204$ , adjusted $P=0.0005$<br>Day 28 $t=4.459$ , $df=204$ , adjusted $P=0.0002$ |
| Figure 7b    | Final body weight (% of initial)           | n=9 vehicle, n=10 WWL70 | Unpaired t-test                                           | $t=2.674$ , $df=17$ , $P=0.0160$                                                                                                                                                                                                                                                                                                                                                                                                                                                                                                                                                                            |
| Figure 7c    | Cumulative food intake (kcal)              | n=9 vehicle, n=9 WWL70  | Two-way ANOVA, with Sidak's post hoc multiple comparisons | Two-way ANOVA<br>Interaction: $F_{(11,176)}=3.591$ , $P=0.0001$<br>Time: $F_{(11,176)}=3668$ , $P<0.0001$<br>Group: $F_{(1,16)}=6.289$ , $P=0.0233$<br><br>Sidak's multiple comparisons<br>All rows before day 21 adjusted $P>0.05$<br>Day 24 $t=3.129$ , $df=192.0$ , adjusted $P=0.0241$<br>Day 26 $t=3.181$ , $df=192.0$ , adjusted $P=0.0204$<br>Day 28 $t=3.164$ , $df=192.0$ , adjusted $P=0.0215$                                                                                                                                                                                                    |
| Figure 7d    | Total food intake (kcal)                   | n=9 vehicle, n=9 WWL70  | Unpaired t-test                                           | $t=2.330$ , $df=16$ , $P=0.0332$                                                                                                                                                                                                                                                                                                                                                                                                                                                                                                                                                                            |
| Figure 7e    | Energy expenditure (kcal/h)                | n=6 vehicle, n=6 WWL70  | Two-way ANOVA, with Sidak's post hoc multiple comparisons | Interaction: $F_{(53,530)}=1.520$ , $P=0.0129$<br>Time: $F_{(53,530)}=11.80$ , $P<0.0001$<br>Group: $F_{(1,10)}=4.707$ , $P=0.0552$<br><br>Sidak's multiple comparisons<br>Row 3 $t=3.383$ , $df=540$ , adjusted $P=0.0407$<br>All other rows adjusted $P>0.05$                                                                                                                                                                                                                                                                                                                                             |
| Figure 7f    | Dark cycle energy expenditure (kcal/12hr)  | n=6 vehicle, n=6 WWL70  | Unpaired t-test                                           | $t=1.826$ , $df=10$ , $P=0.0978$                                                                                                                                                                                                                                                                                                                                                                                                                                                                                                                                                                            |
| Figure 7f    | Light cycle energy expenditure (kcal/12hr) | n=6 vehicle, n=6 WWL70  | Unpaired t-test                                           | $t=2.514$ , $df=10$ , $P=0.0307$                                                                                                                                                                                                                                                                                                                                                                                                                                                                                                                                                                            |
| Figure 7g    | RER                                        | n=6 vehicle, n=6 WWL70  | Two-way ANOVA                                             | Interaction: $F_{(53,530)}=0.7902$ , $P=0.8558$<br>Time: $F_{(53,530)}=1.323$ , $P=0.0693$<br>Group: $F_{(1,10)}=4.798$ , $P=0.0533$                                                                                                                                                                                                                                                                                                                                                                                                                                                                        |
| Figure 7h    | Dark cycle RER                             | n=6 vehicle, n=6 WWL70  | Unpaired t-test                                           | $t=1.821$ , $df=10$ , $P=0.0986$                                                                                                                                                                                                                                                                                                                                                                                                                                                                                                                                                                            |
| Figure 7h    | Light cycle RER                            | n=6 vehicle, n=6 WWL70  | Unpaired t-test                                           | $t=1.744$ , $df=10$ , $P=0.1118$                                                                                                                                                                                                                                                                                                                                                                                                                                                                                                                                                                            |
| Figure 7i    | Beam breaks                                | n=5 vehicle, n=5 WWL70  | Two-way ANOVA                                             | Interaction: $F_{(53,424)}=1.148$ , $P=0.2318$<br>Time: $F_{(53,424)}=4.205$ , $P<0.0001$<br>Group: $F_{(1,8)}=4.630$ , $P=0.0636$                                                                                                                                                                                                                                                                                                                                                                                                                                                                          |
| Figure 7j    | Dark cycle beam breaks                     | n=5 vehicle, n=5 WWL70  | Unpaired t-test                                           | $t=1.681$ , $df=8$ , $P=0.1313$                                                                                                                                                                                                                                                                                                                                                                                                                                                                                                                                                                             |
| Figure 7j    | Light cycle beam breaks                    | n=5 vehicle, n=5 WWL70  | Unpaired t-test                                           | $t=2.580$ , $df=8$ , $P=0.0326$                                                                                                                                                                                                                                                                                                                                                                                                                                                                                                                                                                             |
| Figure 7k    | Center time (%)                            | n=8 vehicle, n=8 WWL70  | Unpaired t-test                                           | $t=0.8933$ , $df=14$ , $P=0.3868$                                                                                                                                                                                                                                                                                                                                                                                                                                                                                                                                                                           |
| Figure 7l    | Center entries (%)                         | n=8 vehicle, n=8 WWL70  | Unpaired t-test                                           | $t=0.1653$ , $df=14$ , $P=0.8711$                                                                                                                                                                                                                                                                                                                                                                                                                                                                                                                                                                           |

## Supplementary Figure 1

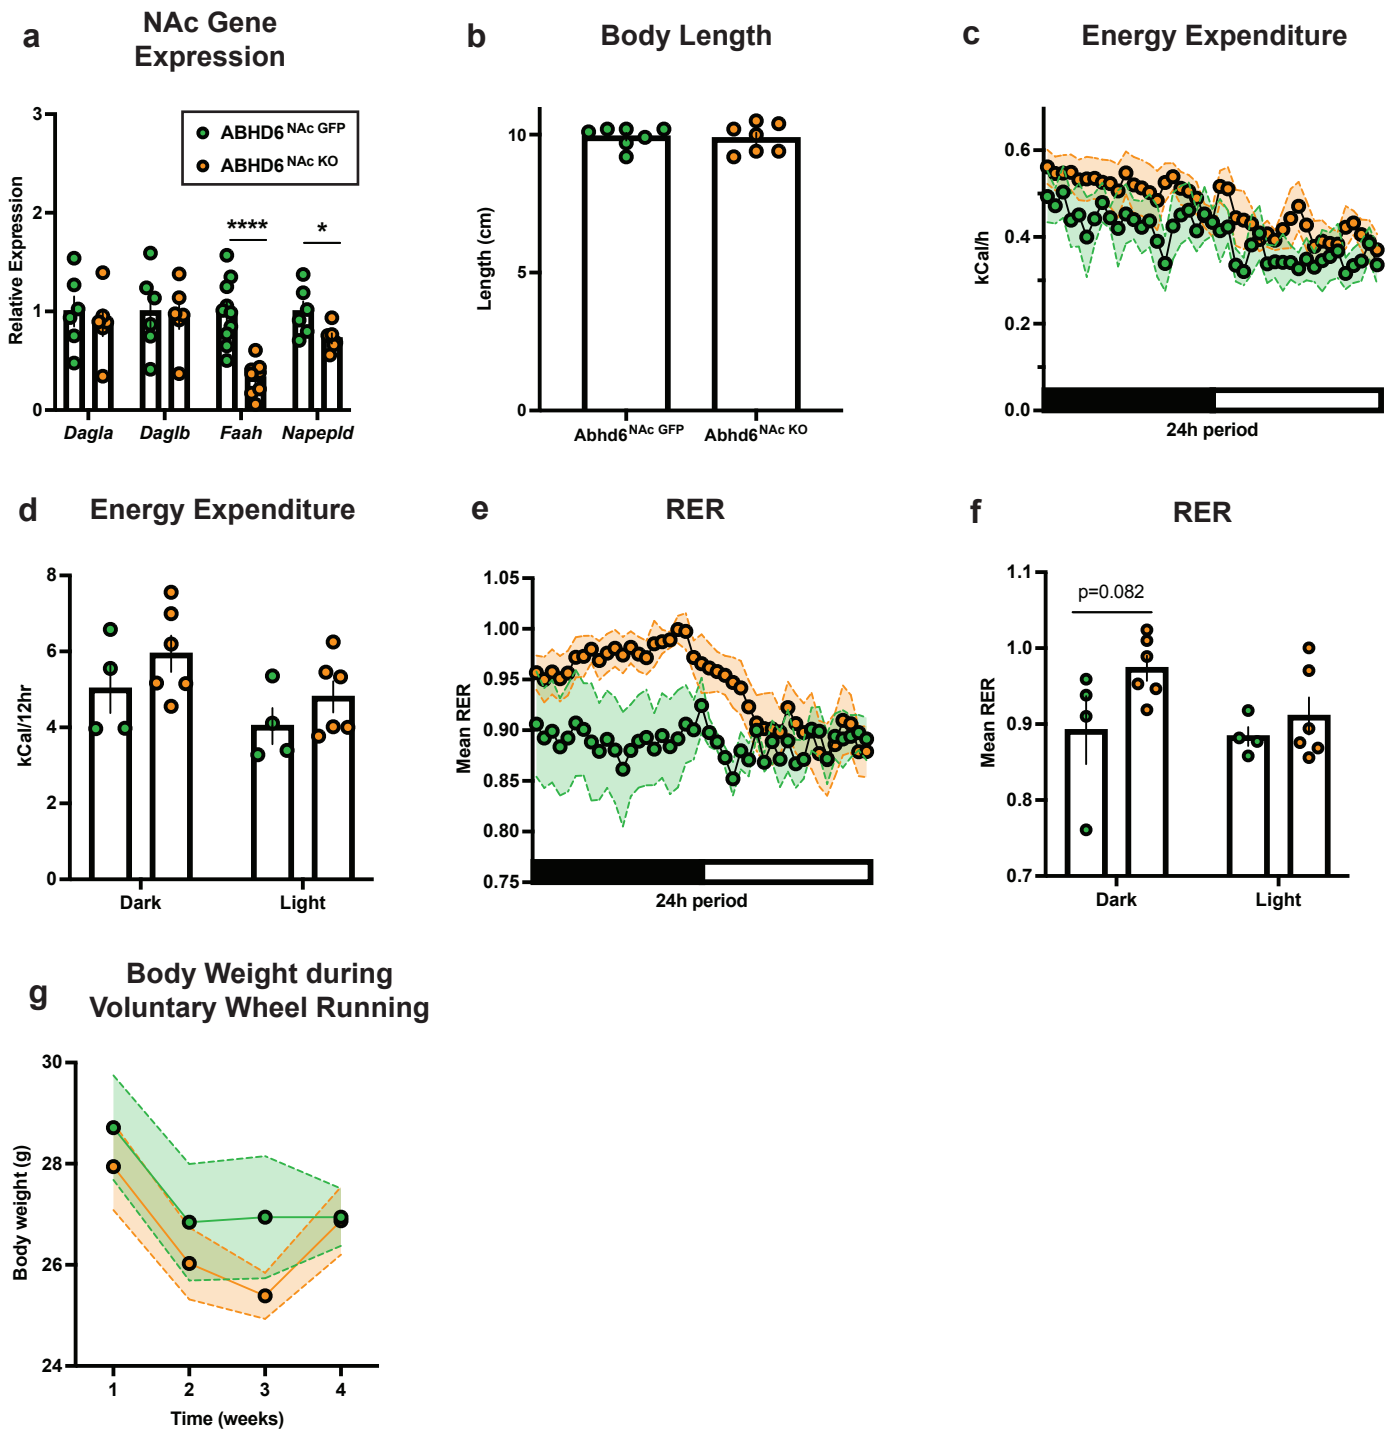

**Supplementary Figure 1. NAc gene expression, body length, and metabolism.** Related to Figure 1. **a** NAc gene expression for *Dagla* (ABHD6<sup>NAc</sup> GFP: n=6, ABHD6<sup>NAc</sup> KO: n=6), *Daglb* (ABHD6<sup>NAc</sup> GFP: n=6, ABHD6<sup>NAc</sup> KO: n=6), *Faah* (ABHD6<sup>NAc</sup> GFP: n=10, ABHD6<sup>NAc</sup> KO: n=8), and *Napepld* (ABHD6<sup>NAc</sup> GFP: n=6, ABHD6<sup>NAc</sup> KO: n=6), **b** Body length (ABHD6<sup>NAc</sup> GFP: n=7, ABHD6<sup>NAc</sup> KO: n=7). **c** Energy expenditure (ABHD6<sup>NAc</sup> GFP: n=4, ABHD6<sup>NAc</sup> KO: n=6). **d** Energy expenditure in (c) during dark (ABHD6<sup>NAc</sup> GFP: n=4, ABHD6<sup>NAc</sup> KO: n=6) and light cycle (ABHD6<sup>NAc</sup> GFP: n=4, ABHD6<sup>NAc</sup> KO: n=6). **e** Respiratory exchange ratio (ABHD6<sup>NAc</sup> GFP: n=4, ABHD6<sup>NAc</sup> KO: n=6). **f** RER in (e) during dark (ABHD6<sup>NAc</sup> GFP: n=4, ABHD6<sup>NAc</sup> KO: n=6) and light cycle (ABHD6<sup>NAc</sup> GFP: n=4, ABHD6<sup>NAc</sup> KO: n=6). **g** Body weight during wheel-running access (ABHD6<sup>NAc</sup> GFP: n=7, ABHD6<sup>NAc</sup> KO: n=7). Data represented as mean, with error bars/shaded areas  $\pm$  SEM. Unpaired t-test (a, b, d, f), two-way ANOVA group x time interaction (c, e, g).

## Supplementary Figure 2

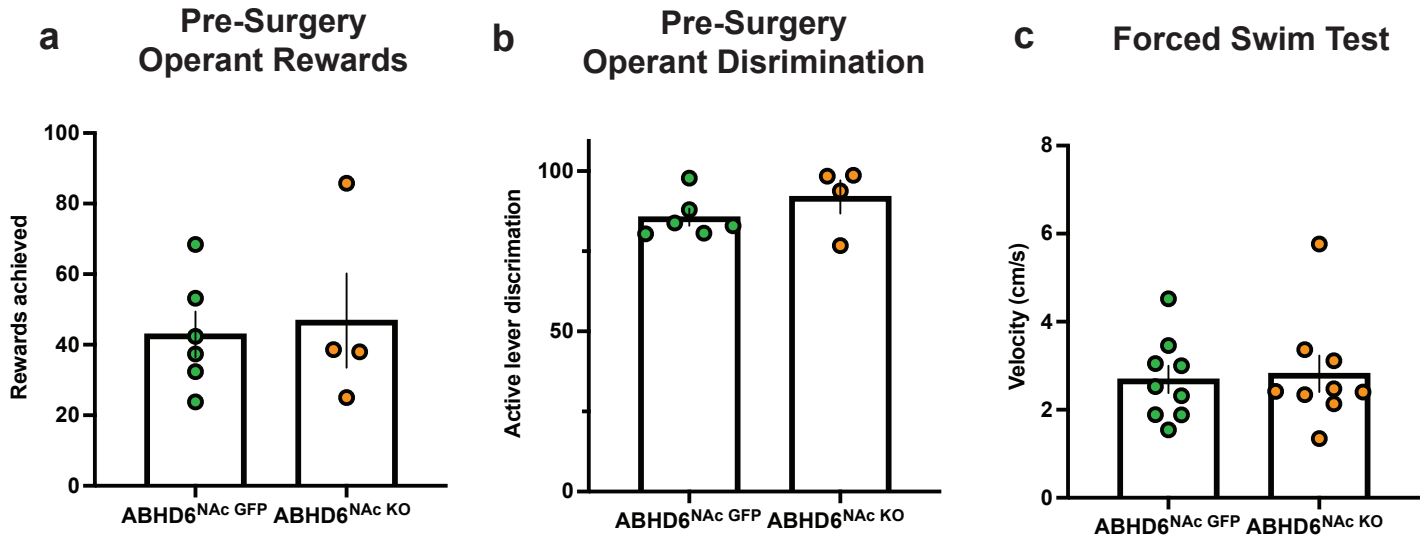

**Supplementary Figure 2. Pre-surgery operant behaviour and forced swim test velocity.** Related to Figure 2. **a** Pre-surgery operant rewards achieved at fixed ratio 5 (ABHD6<sup>NAc</sup> GFP: n=6, ABHD6<sup>NAc</sup> KO: n=4). **b** Pre-surgery operant active lever discrimination at fixed ratio 5 (ABHD6<sup>NAc</sup> GFP: n=6, ABHD6<sup>NAc</sup> KO: n=4). **c** Velocity during forced swim test (ABHD6<sup>NAc</sup> GFP: n=9, ABHD6<sup>NAc</sup> KO: n=9). Data represented as mean, with error bars areas  $\pm$  SEM. Unpaired t-test (**a-c**).

### Supplementary Figure 3

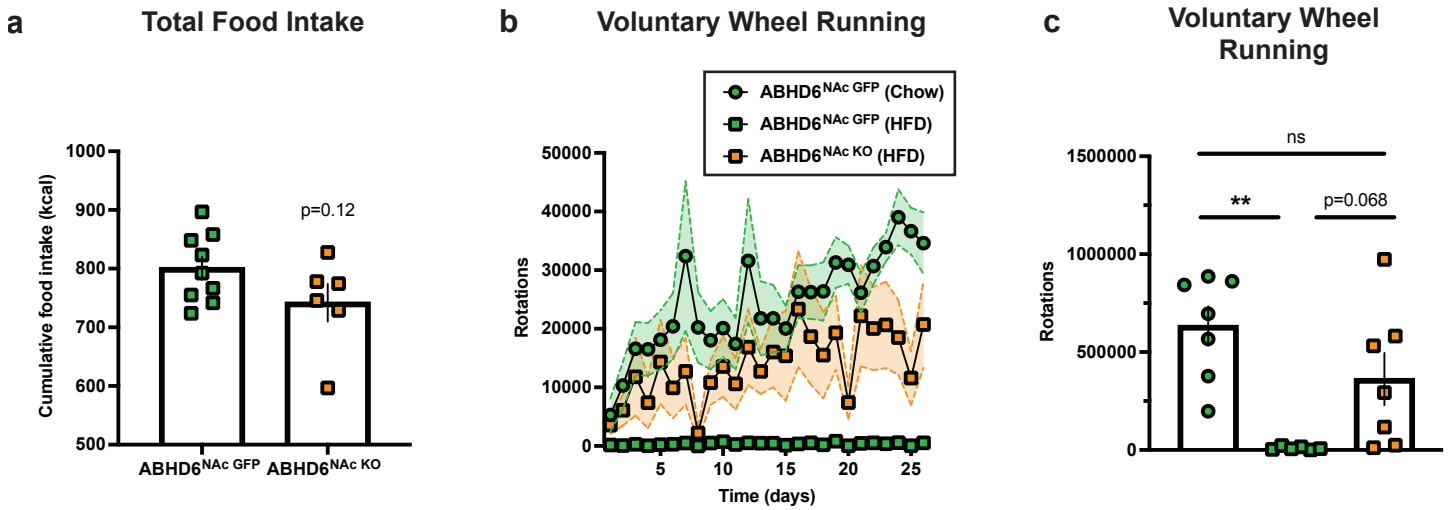

**Supplementary Figure 3. Feeding and wheel-running behaviour on HFD.** Related to Figure 3. **a** Total food intake on HFD (ABHD6<sup>NAc GFP</sup>: n=9, ABHD6<sup>NAc KO</sup>: n=6). **b** Wheel running behaviour on chow or high-fat diet (ABHD6<sup>NAc GFP</sup> (chow): n=7, ABHD6<sup>NAc GFP</sup> (HFD): n=6, ABHD6<sup>NAc KO</sup> (chow): n=7). **c** Total wheel-running behaviour in (b) on chow or HFD (ABHD6<sup>NAc GFP</sup> (chow): n=7, ABHD6<sup>NAc GFP</sup> (HFD): n=6, ABHD6<sup>NAc KO</sup> (chow): n=7; group main effect p=0.0021). Data represented as mean, with error bars/shaded areas  $\pm$  SEM; \*\*p<0.01, \*\*\*p<0.001. Unpaired t-test (a), two-way ANOVA group main effect (b), one-way ANOVA with Tukey post hoc correction (c).



# Supplementary Figure 4

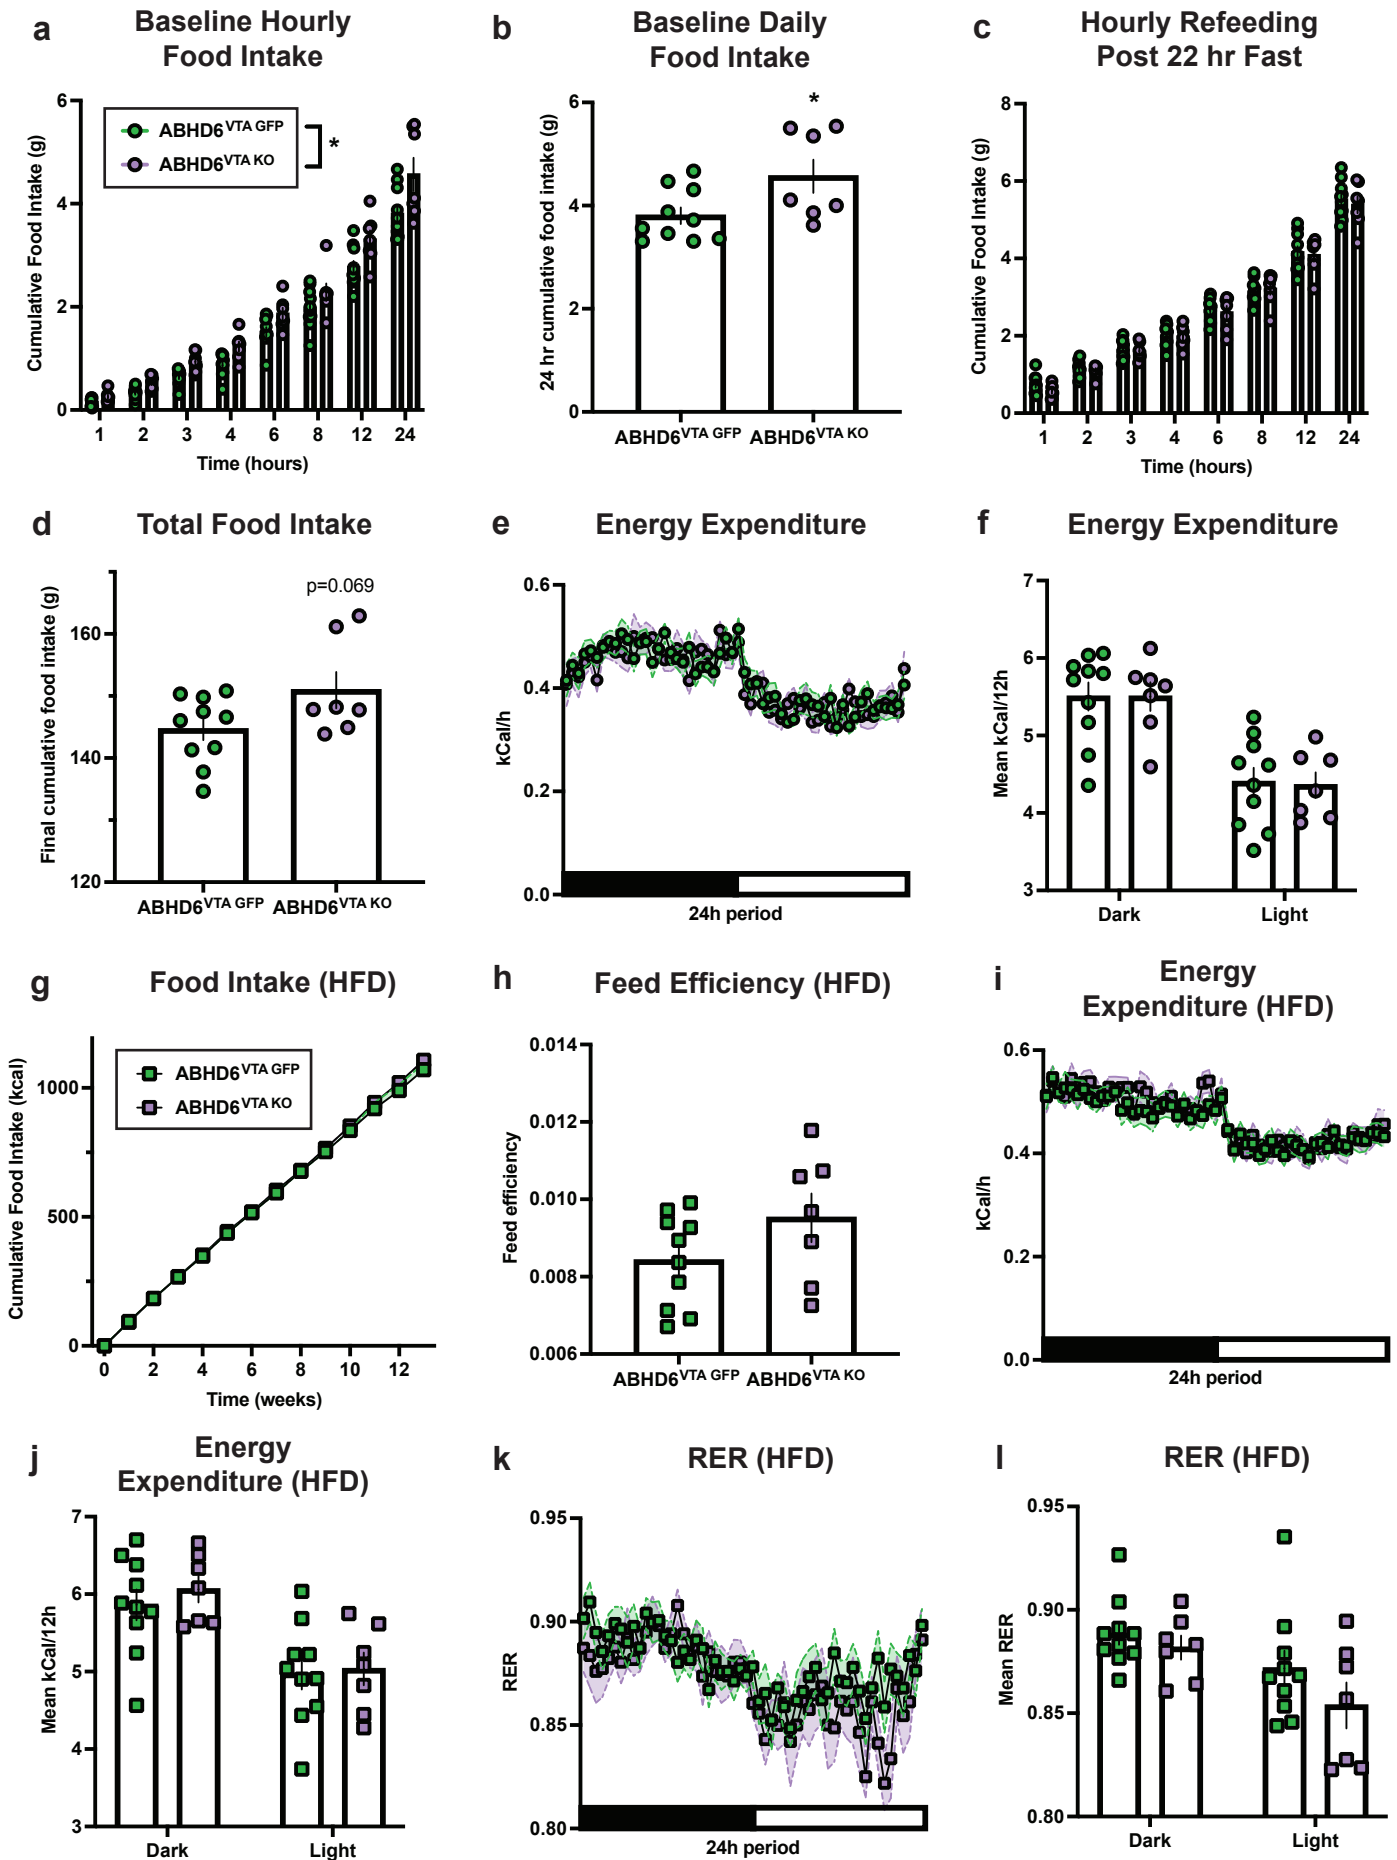

**Supplementary Figure 4. Feeding, body weight, and metabolism on chow and HFD.** Related to Figure 5. **a** Baseline hourly food intake over 24 hr period on chow diet (ABHD6<sup>VTA GFP</sup>: n=10, ABHD6<sup>VTA KO</sup>: n=7). **b** Total daily food intake over 24 hr baseline period on chow diet (ABHD6<sup>VTA GFP</sup>: n=10, ABHD6<sup>VTA KO</sup>: n=7). **c** Refeeding hourly food intake over 24 hr baseline period following a 22 hr fast period (ABHD6<sup>VTA GFP</sup>: n=10, ABHD6<sup>VTA KO</sup>: n=7). **d** Total cumulative food intake over 6 weeks on chow diet (ABHD6<sup>VTA GFP</sup>: n=10, ABHD6<sup>VTA KO</sup>: n=7). **e** Energy expenditure (ABHD6<sup>VTA GFP</sup>: n=10, ABHD6<sup>VTA KO</sup>: n=7). **f** Energy expenditure in (e) during dark (ABHD6<sup>VTA GFP</sup>: n=10, ABHD6<sup>VTA KO</sup>: n=7) or light cycle (ABHD6<sup>VTA GFP</sup>: n=10, ABHD6<sup>VTA KO</sup>: n=7). **g** Food intake on HFD (ABHD6<sup>VTA GFP</sup>: n=10, ABHD6<sup>VTA KO</sup>: n=7). **h** Feed efficiency on HFD (ABHD6<sup>VTA GFP</sup>: n=10, ABHD6<sup>VTA KO</sup>: n=7). **i** Energy expenditure on HFD (ABHD6<sup>VTA GFP</sup>: n=10, ABHD6<sup>VTA KO</sup>: n=7). **j** Energy expenditure in (i) during dark (ABHD6<sup>VTA GFP</sup>: n=10, ABHD6<sup>VTA KO</sup>: n=7) or light cycle (ABHD6<sup>VTA GFP</sup>: n=10, ABHD6<sup>VTA KO</sup>: n=7). **k** Respiratory exchange ratio on HFD (ABHD6<sup>VTA GFP</sup>: n=10, ABHD6<sup>VTA KO</sup>: n=7). **l** RER in (k) during dark (ABHD6<sup>VTA GFP</sup>: n=10, ABHD6<sup>VTA KO</sup>: n=7) or light cycle (ABHD6<sup>VTA GFP</sup>: n=10, ABHD6<sup>VTA KO</sup>: n=7). Data represented as mean, with error bars/shaded areas  $\pm$  SEM; \* $p < 0.05$ . Unpaired t-test (b, d, f, h, j, l), two-way ANOVA group x time interaction (c, e, g, i, k), two-way ANOVA group main effect (a).

## Supplementary Figure 5

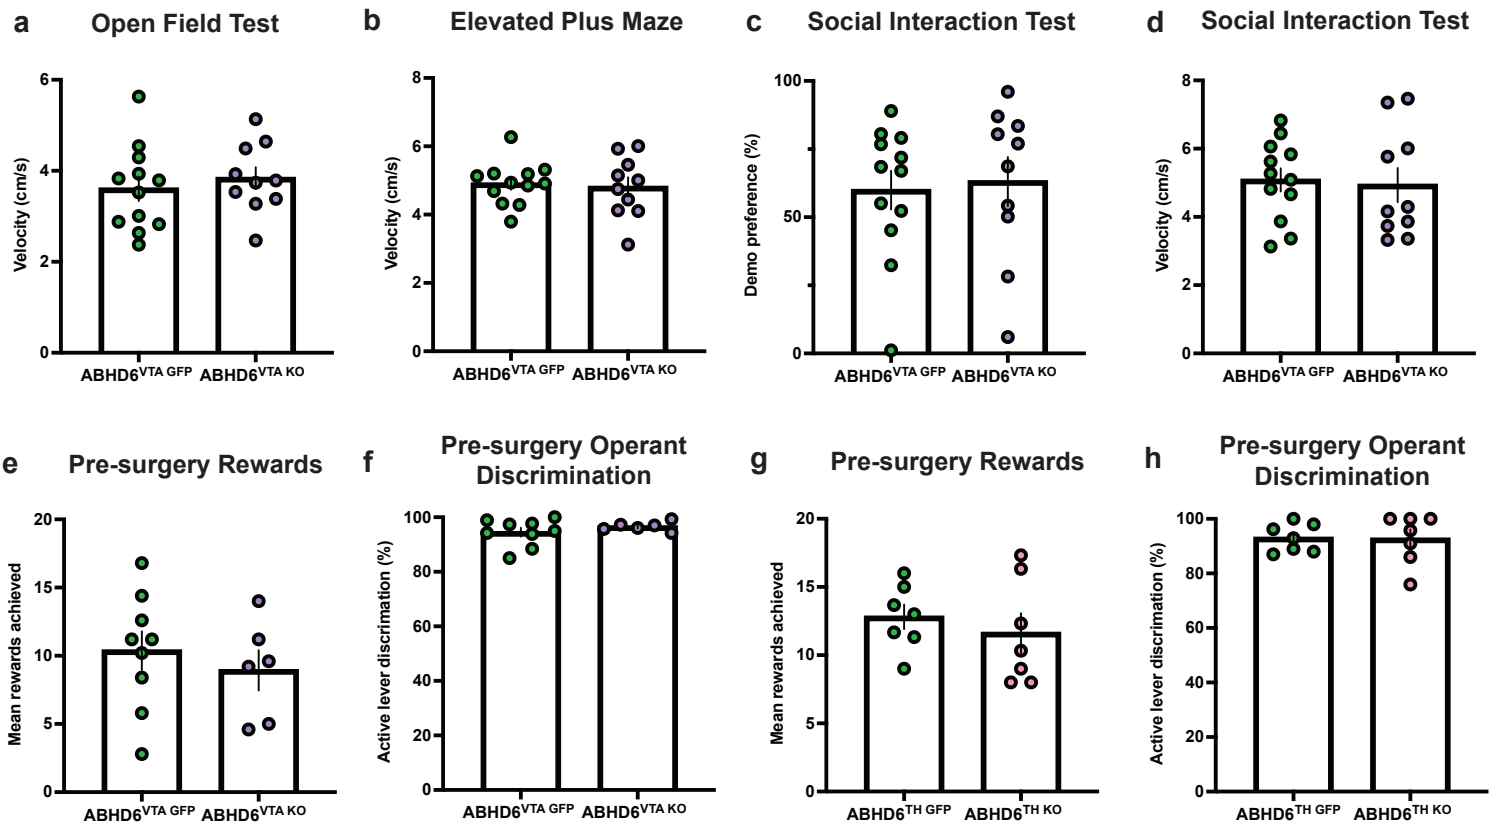

**Supplementary Figure 5. Velocity and social behaviour in the social interaction test and presurgery operant behaviour.** Related to Figure 6. **a** Velocity (ABHD6<sup>VTA</sup> GFP: n=12, ABHD6<sup>VTA</sup> KO: n= 10). **b** Velocity (ABHD6<sup>VTA</sup> GFP: n=12, ABHD6<sup>VTA</sup> KO: n= 10). **c** Demonstrator mouse interaction preference (ABHD6<sup>VTA</sup> GFP: n=12, ABHD6<sup>VTA</sup> KO: n= 10). **d** Velocity (ABHD6<sup>VTA</sup> GFP: n=12, ABHD6<sup>VTA</sup> KO: n= 10). **e** Mean pre-surgery rewards achieved during progressive ratio operant test (ABHD6<sup>VTA</sup> GFP: n=9, ABHD6<sup>VTA</sup> KO: n=6). **f** Mean pre-surgery active lever discrimination during progressive ratio operant test (ABHD6<sup>VTA</sup> GFP: n=9, ABHD6<sup>VTA</sup> KO: n=6). **g** Mean pre-surgery rewards achieved during operant test (ABHD6<sup>TH</sup> GFP: n=7, ABHD6<sup>TH</sup> KO: n=7). **h** Mean pre-surgery active lever discrimination during operant test (ABHD6<sup>TH</sup> GFP: n=7, ABHD6<sup>TH</sup> KO: n=7). Data represented as mean, with error bars  $\pm$  SEM. Unpaired t-test (**a-h**).
